# Supplementary material for: Microglia: active sensor and versatile effector cells in the normal and pathologic brain
Source: Springer Nature journal article supplement (doi:10.1038/nn1997), 2007-10-26
Supplement: 41593_2007_BFnn1997_MOESM34_ESM.pdf [file 41593_2007_BFnn1997_MOESM34_ESM.pdf]

---

**SUPPLEMENT**

---

**Phenotype diversity of macrophages**

Macrophages can reveal markedly different reactive behaviour depending on the stimulating conditions and their environmental context<sup>1</sup>. According to their polarization, and in relation to the nomenclature of Th1 and Th2 types of immune responses (Th as for T helper cell), differentially induced macrophages were referred to as M1 or M2 cells<sup>2</sup>. The first conscious description of macrophage phenotype versatility originated from an 'alternative' activation with the Th2 cytokine interleukin-4 (IL-4)<sup>3</sup>. Macrophages incubated under IL-4 influence (M2 polarization) differ from macrophages 'classically' stimulated (M1 polarization) by the Th1 cytokine interferon- $\gamma$  (IFN $\gamma$ ) and/or bacterial lipopolysaccharide (LPS), a major cell wall component of Gram-negative bacteria. Alternative activation with IL-4 or IL-13 results in a marked production of IL-10, but little or no IL-12(p70), whereas an inverse ratio is obtained with classically activated cells. Inspired by this seminal observation, numerous non-classical macrophage phenotypes have been described on the basis of transcriptional and non-transcriptional features<sup>1,2,4</sup>. Macrophage populations thereby present with distinct expression patterns, and indicative, often reciprocal inductions of key molecules (e.g. IL-10/IL-12/IL-23 or iNOS/arginase, ManR etc.) allow for the identification of the respective phenotype orientation. Nevertheless, the most important aspect is their functional diversity and the resulting consequences for other cells. Macrophages of discrete functional orientation vary in T and B cell interactions, bias for types of immune responses (Th1/Th2), promote or rather resolve inflammation and differ by influences on the extracellular matrix (ECM) structures. By extreme polarization, macrophages direct their activities towards defence or repair. For example, binding of immunoglobulins of various classes/subclasses to their respective Fc receptors can cause completely different responses<sup>5</sup>. Activation by IgG/immune complexes (IC) of the Fc $\gamma$ R types linked directly or via FcR $\gamma$  chain to an intracellular ITAM signalling module (cytoplasmic immunoreceptor tyrosine-based activation motif) can induce toxic macrophage reactions while occupation of Fc $\gamma$ RIIB linked to ITIM (immunoreceptor tyrosine-based inhibitory motif which can control ITAM activities) causes opposite effects or prevents killing activities<sup>6-8</sup>. Activities of IgG/IC are further controlled by Fc carbohydrate modification<sup>9</sup>. In addition, cellular responses can drastically shift when pairing IgG/ICs with additional stimuli, such as LPS<sup>10</sup>. Other striking examples for different reactive behaviour relate to tumour-associated macrophages and their support of immune evasion<sup>2,11</sup> or to the association of inflammatory macrophage subsets with metabolic diseases, such as obesity and atherosclerosis<sup>12-14</sup>. For additional information regarding the features and functions of (especially) microglia in health and disease, development and aging, we refer to recent reviews<sup>15-31</sup>.

**References**

1. Gordon,S. Alternative activation of macrophages. *Nat. Rev. Immunol.* **3**, 23-35 (2003).
2. Mantovani,A. *et al.* The chemokine system in diverse forms of macrophage activation and polarization. *Trends Immunol.* **25**, 677-686 (2004).
3. Stein,M., Keshav,S., Harris,N., & Gordon,S. Interleukin 4 potently enhances murine macrophage mannose receptor activity: a marker of alternative immunologic macrophage activation. *J. Exp. Med.* **176**, 287-292 (1992).

4. Gordon,S. & Taylor,P.R. Monocyte and macrophage heterogeneity. *Nat. Rev Immunol.* **5**, 953-964 (2005).
5. Nimmerjahn,F. & Ravetch,J.V. Divergent immunoglobulin g subclass activity through selective Fc receptor binding. *Science* **310**, 1510-1512 (2005).
6. Sutterwala,F.S., Noel,G.J., Clynes,R., & Mosser,D.M. Selective suppression of interleukin-12 induction after macrophage receptor ligation. *J. Exp. Med.* **185**, 1977-1985 (1997).
7. Grazia,C.M., Sutterwala,F.S., Trinchieri,G., Mosser,D.M., & Ma,X. Suppression of Il-12 transcription in macrophages following Fc gamma receptor ligation. *J. Immunol.* **166**, 4498-4506 (2001).
8. Monari,C. *et al.* Microbial immune suppression mediated by direct engagement of inhibitory fc receptor. *J. Immunol.* **177**, 6842-6851 (2006).
9. Kaneko,Y., Nimmerjahn,F., & Ravetch,J.V. Anti-inflammatory activity of immunoglobulin G resulting from Fc sialylation. *Science* **313**, 670-673 (2006).
10. Gerber,J.S. & Mosser,D.M. Stimulatory and inhibitory signals originating from the macrophage Fc gamma receptors. *Microbes. Infect.* **3**, 131-139 (2001).
11. Gallina,G. *et al.* Tumors induce a subset of inflammatory monocytes with immunosuppressive activity on CD8+ T cells. *J. Clin. Invest* **116**, 2777-2790 (2006).
12. Gordon,S. Macrophage heterogeneity and tissue lipids. *J. Clin. Invest* **117**, 89-93 (2007).
13. Swirski,F.K. *et al.* Ly-6Chi monocytes dominate hypercholesterolemia-associated monocytosis and give rise to macrophages in atheromata. *J. Clin. Invest* **117**, 195-205 (2007).
14. Lumeng,C.N., Bodzin,J.L., & Saltiel,A.R. Obesity induces a phenotypic switch in adipose tissue macrophage polarization. *J. Clin. Invest* **117**, 175-184 (2007).
15. Dheen,S.T., Kaur,C., & Ling,E.A. Microglial activation and its implications in the brain diseases. *Curr. Med. Chem.* **14**, 1189-1197 (2007).
16. Kaur,C., Dheen,S.T., & Ling,E.A. From blood to brain: amoeboid microglial cell, a nascent macrophage and its functions in developing brain. *Acta Pharmacol. Sin.* **28**, 1087-1096 (2007).
17. Sanders,P. & De,K.J. Janus faces of microglia in multiple sclerosis. *Brain Res. Rev* **54**, 274-285 (2007).
18. Kim,Y.S. & Joh,T.H. Microglia, major player in the brain inflammation: their roles in the pathogenesis of Parkinson's disease. *Exp. Mol. Med.* **38**, 333-347 (2006).
19. Lai,A.Y. & Todd,K.G. Microglia in cerebral ischemia: molecular actions and interactions. *Can. J. Physiol Pharmacol.* **84**, 49-59 (2006).
20. Chew,L.J., Takanohashi,A., & Bell,M. Microglia and inflammation: impact on developmental brain injuries. *Ment. Retard. Dev. Disabil. Res. Rev* **12**, 105-112 (2006).
21. Melchior,B., Puntambekar,S.S., & Carson,M.J. Microglia and the control of autoreactive T cell responses. *Neurochem. Int.* **49**, 145-153 (2006).
22. Conde,J.R. & Streit,W.J. Microglia in the aging brain. *J. Neuropathol. Exp. Neurol.* **65**, 199-203 (2006).
23. Streit,W.J., Conde,J.R., Fendrick,S.E., Flanary,B.E., & Mariani,C.L. Role of microglia in the central nervous system's immune response. *Neurol. Res.* **27**, 685-691 (2005).
24. Cabral,G.A. & Marciano-Cabral,F. Cannabinoid receptors in microglia of the central nervous system: immune functional relevance. *J. Leukoc. Biol.* **78**, 1192-1197 (2005).
25. Dringen,R. Oxidative and antioxidative potential of brain microglial cells. *Antioxid. Redox. Signal.* **7**, 1223-1233 (2005).
26. Block,M.L. & Hong,J.S. Microglia and inflammation-mediated neurodegeneration: multiple triggers with a common mechanism. *Prog. Neurobiol.* **76**, 77-98 (2005).
27. Streit,W.J. Microglia and neuroprotection: implications for Alzheimer's disease. *Brain Res. Brain Res. Rev* **48**, 234-239 (2005).
28. Sargsyan,S.A., Monk,P.N., & Shaw,P.J. Microglia as potential contributors to motor neuron injury in amyotrophic lateral sclerosis. *Glia* **51**, 241-253 (2005).

29. Weydt,P. & Moller,T. Neuroinflammation in the pathogenesis of amyotrophic lateral sclerosis. *Neuroreport* **16**, 527-531 (2005).
30. Nakajima,K. & Kohsaka,S. Microglia: neuroprotective and neurotrophic cells in the central nervous system. *Curr. Drug Targets. Cardiovasc. Haematol. Disord.* **4**, 65-84 (2004).
31. Town,T., Nikolic,V., & Tan,J. The microglial "activation" continuum: from innate to adaptive responses. *J. Neuroinflammation.* **2**, 24 (2005).
